# Ocean Warming, More than Acidification, Reduces Shell Strength in a Commercial Shellfish Species during Food Limitation

Clara L. Mackenzie<sup>1‡</sup>, Graham A. Ormondroyd<sup>2</sup>, Simon F. Curling<sup>2</sup>, Richard J. Ball<sup>3</sup>, Nia M. Whiteley<sup>4\*</sup>, Shelagh K. Malham<sup>1</sup>

**1** School of Ocean Sciences, College of Natural Sciences, Bangor University, Menai Bridge, Anglesey, United Kingdom, **2** Biocomposites Centre, Bangor University, Bangor, Gwynedd, United Kingdom, **3** Department of Architecture and Civil Engineering, University of Bath, Bath, Somerset, United Kingdom, **4** School of Biological Sciences, College of Natural Sciences, Bangor University, Bangor, Gwynedd, United Kingdom

## Abstract

Ocean surface pH levels are predicted to fall by 0.3–0.4 pH units by the end of the century and are likely to coincide with an increase in sea surface temperature of 2–4°C. The combined effect of ocean acidification and warming on the functional properties of bivalve shells is largely unknown and of growing concern as the shell provides protection from mechanical and environmental challenges. We examined the effects of near-future pH (ambient pH –0.4 pH units) and warming (ambient temperature +4°C) on the shells of the commercially important bivalve, *Mytilus edulis* when fed for a limited period (4–6 h day<sup>-1</sup>). After six months exposure, warming, but not acidification, significantly reduced shell strength determined as reductions in the maximum load endured by the shells. However, acidification resulted in a reduction in shell flex before failure. Reductions in shell strength with warming could not be explained by alterations in morphology, or shell composition but were accompanied by reductions in shell surface area, and by a fall in whole-body condition index. It appears that warming has an indirect effect on shell strength by re-allocating energy from shell formation to support temperature-related increases in maintenance costs, especially as food supply was limited and the mussels were probably relying on internal energy reserves. The maintenance of shell strength despite seawater acidification suggests that biomineralisation processes are unaffected by the associated changes in CaCO<sub>3</sub> saturation levels. We conclude that under near-future climate change conditions, ocean warming will pose a greater risk to shell integrity in *M. edulis* than ocean acidification when food availability is limited.

**Citation:** Mackenzie CL, Ormondroyd GA, Curling SF, Ball RJ, Whiteley NM, et al. (2014) Ocean Warming, More than Acidification, Reduces Shell Strength in a Commercial Shellfish Species during Food Limitation. PLoS ONE 9(1): e86764. doi:10.1371/journal.pone.0086764

**Editor:** Howard I. Browman, Institute of Marine Research, Norway

**Received:** August 5, 2013; **Accepted:** December 13, 2013; **Published:** January 28, 2014

**Copyright:** © 2014 Mackenzie et al. This is an open-access article distributed under the terms of the Creative Commons Attribution License, which permits unrestricted use, distribution, and reproduction in any medium, provided the original author and source are credited.

**Funding:** Funded by the project entitled: Shellfish Productivity in the Irish Sea, working towards a sustainable future (SUSFISH). SUSFISH is part-funded by the European Regional Development Fund (ERDF) through the Ireland Wales Territorial Co-operation (INTERREG 4A) Programme 2007–2013. INTERREG 4A is managed in Ireland by the Southern and Eastern Regional Assembly on behalf of the Irish Government, the Welsh Government and the European Commission. <http://www.irelandwales.ie>. The funders had no role in study design, data collection and analysis, decision to publish, or preparation of the manuscript.

**Competing Interests:** The authors have declared that no competing interests exist.

\* E-mail: [n.m.whiteley@bangor.ac.uk](mailto:n.m.whiteley@bangor.ac.uk)

‡ Current address: Centre for Marine Biodiversity and Biotechnology, School of Life Sciences, Heriot-Watt University, Edinburgh, Scotland, United Kingdom

## Introduction

Ocean acidification (OA) has been reported to affect calcification processes in the shells of bivalve species by decreasing rates of calcium carbonate precipitation and/or increasing dissolution [1,2,3]. At the levels of pH reduction predicted for the end of the century, there are also many reports of the maintenance of calcification rates and shell growth despite reductions in pH and associated changes in CaCO<sub>3</sub> saturation levels, especially in the blue mussel, *Mytilus edulis* (reviewed by Gazeau *et al.* [4]). Maintenance of shell growth, however, may compromise shell function as compensation for increases in shell dissolution under OA conditions can be energetically costly and compromise other homeostatic functions [5] with more extensive corrosion of the shell when food supply is limited [2]. The resulting effects of OA on mechanical strength in bivalve shells is poorly understood with most studies focusing on early life stages and the development of shell formation [6,7,8]. These studies suggest that short to medium

term exposure to decreases in pH of  $>/= 0.4$  pH units can thin and weaken the bivalve shell [9,10,11]. As OA is not occurring in isolation from other environmental factors, there is an increasing realisation that concomitant changes in the environment are much more relevant to the conditions experienced by marine calcifiers in their natural environment, such as those predicted to occur as a result of climate change [12–15]. For example, a decrease in ocean pH by 0.2 to 0.4 pH units by the end of the century under the IPCC IS92a CO<sub>2</sub> emission scenario [16,17] is likely to coincide with an increase in mean sea surface temperature of 2–4°C [16,18].

Temperature is a key environmental variable and has a significant effect on biomineralization processes and growth in bivalve shells (reviewed by Gazeau *et al.* [4]). Generally, temperature has a positive linear effect on shell growth [19], and can also result in changes in mineral composition. For example, shells built of the aragonite polymorph of calcium carbonate are more

susceptible to dissolution at low temperatures [20], which may lead to a thinning of the shells [21], and could explain why shells in cold-water bivalves are characterised by an increase in the whole-shell calcite:aragonite ratio due to an increase in calcite, the less soluble but mechanically weaker polymorph of calcium carbonate [22]. More recently it has also been reported that temperature may also have an effect on shell microstructure by altering tablet width, thickness and angle spread of aragonite crystals in the nacreous structure of molluscan shells [23]. The functional significance of the observed changes, however, remains unclear [23]. In addition, the combined effects of OA and warming on the mechanical properties of the shells in adult bivalve molluscs over an extended exposure period (i.e. months) are largely unknown. Limited research on other taxa suggests that an elevation in temperature during OA is likely to have a negative synergistic effect on calcification processes with reductions in pH increasing the sensitivity of some species [13,14,24].

The effects of ocean warming and acidification on commercial shellfish species are of growing concern as molluscs and crustaceans comprise the majority of global seafood production [25]. Species such as the blue mussel *Mytilus edulis* represent an important regional and global resource with worldwide mussel fisheries estimated to be worth 390 million (\$US) [26]. *M. edulis* also provides a number of important ecosystem services including uptake and recycling of energy and nutrients (benthic-pelagic coupling), bioturbation and bioirrigation of marine sediments, sediment/shoreline stabilization and habitat formation [27,28]. The survival and health of *M. edulis* is dependent on its shell which performs a range of functions from providing primary defence against predators to delivering protection from physical environmental stressors. It also acts as a skeleton for muscle attachments and prevents sediment from collecting in the mantle cavity [29]. Additionally, the bivalve shell plays an important role in physiological homeostasis [30,31]. Therefore any reduction in shell thickness, mechanical strength or alterations in shell microstructure and composition could have a profound effect on survival, not only by reducing protection of the soft tissues from predators and anthropogenic activity, but by also influencing the ability of *M. edulis* to respond to environmental change.

The purpose of the current study was to examine the combined effects of near-future OA and warming on the morphology, shell composition and surface area of adult *M. edulis* shells, as well as to examine the resulting effects on their functional properties by determining mechanical strength and flexibility. Mussels were collected from a sub-tidal population not normally exposed to extreme pH fluctuations, and exposed to an elevation in seawater temperature (warming) and reduction in pH (acidification) to match the levels predicted for 2100, either alone or in combination. Measurements were taken after six months exposure to avoid the most immediate effects of environmental change and to assess the ability of the mussels to compensate and maintain the functional properties of their shells in the longer-term. Mussels were fed 4–6 h day<sup>-1</sup> in order to assess the functional repercussions of limited food availability which is relevant for future climate change scenarios where food is in short supply.

## Materials and Methods

### Animal Collection

Adult *Mytilus edulis* (L.) were collected subtidally from mussel beds in the Menai Strait, North Wales, UK using a mussel dredge (Deep Dock Ltd.) in May, 2011. Sub-surface (depth 3 m) seawater temperature in the Menai Strait for 2011–2012 as measured with a temperature data logger (Hobo Pendant Temperature Data

Logger, Measurement Systems Ltd., Newbury, UK) is presented in Fig. 1. Mussels (640 in total with mean shell length = 50.51 ± 0.15 mm) were transported to aquaria at the School of Ocean Sciences, Bangor University where they were held in aerated seawater in large (200 litre) flow-through holding tanks (12.5 ± 0.26 SD °C, pH 8.01 ± 0.08 SD, Salinity 34 ± 1 SD psu, 12L:12D light regime) for 3 weeks prior to the start of the experiment. The mussels were drip-fed concentrated algal feed (Instant Algae Shellfish Diet 1800, Reed Mariculture, Campbell, CA, USA; 40% *Isochrysis* sp., 15% *Pavlova* sp., 25% *Tetraselmis* sp. and 20% *Thalassiosira weissflogii*; 52% protein, 16.1% lipid, 22.0% carbohydrate and 9.9% ash) at a ration of 27 mg dry mass mussel<sup>-1</sup> day<sup>-1</sup> over a period of 4–6 hours day<sup>-1</sup>.

### Ethics Statement

No specific permits were required for the study, which complied with all relevant regulations. The species collected in this study is not endangered or protected.

### Experimental Set-up

Adult *M. edulis* were exposed for six months in an aquarium-based CO<sub>2</sub> system to represent present and near-future (i.e. 2100) pH (ambient pH and a decrease of 0.4 pH units) and temperature (ambient 12°C and an increase of 4°C). A factorial experimental design was applied in order to examine the influence of each factor on its own plus their interactive effects. The four treatments were: ambient pH at ambient temperature (ambient); ambient pH at ambient temperature +4°C (warming); reduced pH at ambient temperature (acidified); and reduced pH at ambient temperature +4°C (warming+acidified).

Seawater was pumped from the Menai Strait via an external settling tank to a central indoor sump tank (500 l) held in an air-conditioned (air temperature 12°C) aquarium. Seawater was triple-filtered and UV treated before delivery to each of four header tanks (150 l) representative of the four experimental treatments. The temperature of each header tank was kept constant through use of in-line heaters (Elecro 900 Evo Titanium Digital Aquarium Heater, Elecro Engineering Ltd., Hertfordshire, UK) or flow-through cooling units (Aqua Medic TITAN 2000, Aqua Medic Inc, Loveland, CO, USA). These circulation systems also ensured adequate mixing of the seawater. A reduction in pH was achieved by computer controlled addition of CO<sub>2</sub> (g). A pH controller (Walchem Dual Input pH Series Controller, Walchem, Holliston, MA, USA) set to end-century pH conditions (pH 7.68) and pH of each high CO<sub>2</sub> treatment regulated via solenoid valves. A handheld temperature-compensated (HTC) pH meter (Mettler Toledo SG2 SevenGO, MT Ltd., Leicester, UK) was used to measure pH and the pH controller was adjusted accordingly. The HTC pH meter was triple calibrated using Fisher Scientific buffer solutions (pH<sub>NIST</sub> = 4.01, pH<sub>NIST</sub> = 7.00, pH<sub>NIST</sub> = 10.01 at 25°C).

Seawater from each header tank was gravity-fed (flow rate ~300 ml minute<sup>-1</sup>) to 20 smaller (1.5 l) mussel tanks with overflows running to waste. Eight individual mussels were haphazardly assigned to each tank per treatment. Mussels were acclimated to temperature treatments at an increase of 0.5°C day<sup>-1</sup>. All tanks were cleaned three times per week and mussels were drip-fed concentrated algal feed (Instant Algae Shellfish Diet 1800, Reed Mariculture, Campbell, CA, USA) at a ration of 27 mg dry mass mussel<sup>-1</sup> day<sup>-1</sup> over a period of 4–6 hours day<sup>-1</sup>. Mussels were held at a photoperiod of 12L:12D. Shell length, measured to the nearest 0.01 mm with digital callipers (n = 20), was recorded at the beginning and end of the experimental period. Soft tissues were removed from 20 individ-

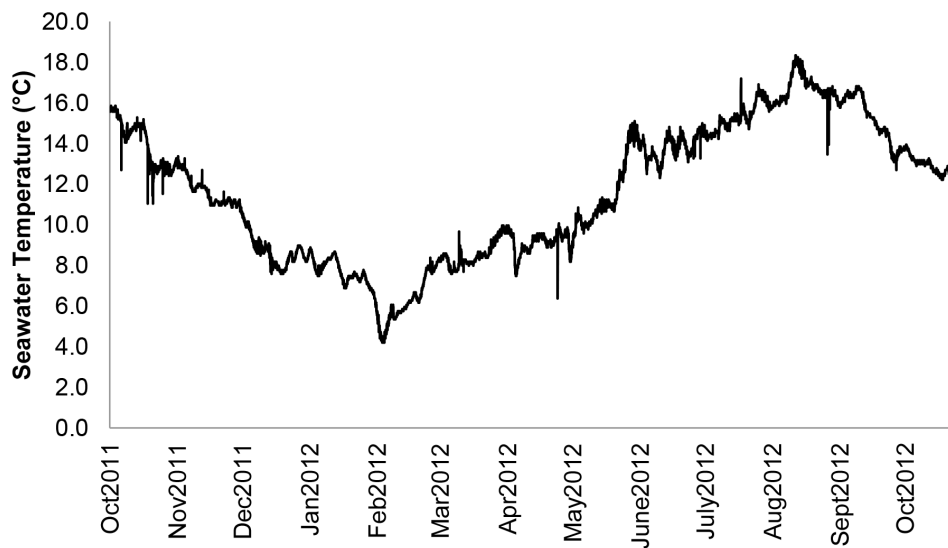

**Figure 1. Sub-surface seawater temperature in the Menai Strait (Wales, UK) between October 2011 and October 2012.** Temperature was measured at 3 m below sea surface. doi:10.1371/journal.pone.0086764.g001

uals at the start of the experiment to represent baseline values, and then from mussels from each treatment ( $n = 20$ ) after six months exposure to determine dry tissue mass by drying the total soft tissue at  $80^{\circ}\text{C}$  for 72 h. The condition index (CI) of each mussel was determined as:

$$CI = \frac{DW_f}{SL^3}$$

where  $DW_f$  = mg total soft tissue dry weight, and  $SL$  = shell length (cm) after Clausen and Riisgård [32].

### Seawater Parameters

For the analysis of total alkalinity and dissolved inorganic carbon (DIC), seawater samples (60 ml) were taken in triplicate every two weeks in air-tight glass-stoppered containers poisoned with 0.02% mercuric chloride according to procedures outlined by Dumousseaud *et al.* [33]. Temperature and salinity of each sample were also recorded. All samples were analysed by the Carbonate System Facility (LIMS) at National Oceanography Centre, Southampton. Seawater samples (30 ml) were taken at the same time from header mixing tanks, filtered (Whatman GFF 0.7  $\mu\text{m}$ ) and frozen ( $-20^{\circ}\text{C}$ ) for the determination of phosphate and silicate concentrations at the Scottish Association for Marine Sciences, Oban, Scotland, UK. Temperature, salinity and carbonate parameters were entered into the CO2SYS model [34] to determine the remaining seawater carbonate parameters (i.e. pH,  $p\text{CO}_2$ ,  $\text{HCO}_3^-$ ,  $\text{CO}_3^{2-}$ ,  $\Omega\text{Ar}$ ,  $\Omega\text{Ca}$  cf Table 1 for explanation) using the thermodynamic constants of Mehrbach *et al.* [35] refitted by Dickson and Millero [36]. Table 1 outlines the carbonate chemistry of each experimental treatment as determined by the CO2SYS model. Additionally, seawater pH and temperature of three randomly selected experimental tanks were measured daily so as to ensure approximate pH and temperature treatments were maintained over the course of the experiment. Prior to seawater pH measurements, the electrode was placed in seawater for approximately one hour to stabilise the liquid junction potential of the electrode [9]. Weekly, nitrate levels were monitored (API Liquid Nitrate Test Kits) and salinity was

measured with a refractometer (TMC V2 ATC) calibrated with distilled water prior to use.

### Shell Morphometrics

After six months of exposure, 18 mussels were removed from each treatment group. Following the removal of all flesh, shells were cleaned with de-ionised water and dried at room temperature for 3 weeks. Shell weight was measured with an analytical laboratory balance (Sartorius analytic), and shell length, width, height and thickness (at umbo and distal margin of shell) as defined by Seed [37] were measured with Vernier Callipers (Mitutoyo Series 500, Mitutoyo UK Ltd, Hampshire, UK) to the nearest 0.01 mm.

### Shell Strength

Shell strength was determined on the same shells used for the morphometric measurements ( $n = 18$  per treatment) by measuring the maximum load that each shell valve could endure, and by measuring shell extension properties. Individual load and extension values were calculated as the mean of the two valves for each mussel. Maximum load refers to the highest point on the load-time curve before failure (i.e. fracture) while extension refers to the distance a shell will bend/flex before failure. A decrease in extension may also indicate an increase in brittleness of the shells. Maximum load and extension of individual shell valves were determined using an Instron Universal Testing Machine (Model 2243; 5 kN load cell; 3-point fixture, High Wycombe, Bucks, UK) with loading span of 50 mm and crosshead speed of  $5 \text{ mm min}^{-1}$  (Illinois Tool Works Inc, IL, USA). All shell valves were placed on the stage of the testing machine in an identical orientation (i.e. shell length along horizontal axis, outer shell surface facing upwards). Maximum loads were recorded at the central point of the outer shell surface. Results were recorded and plotted using Bluehill Software (v.2) (Illinois Tool Works Inc, IL, USA).

### Shell Surface Analysis

A subsample ( $n = 3$  per treatment) of shells from each treatment was subsequently used to determine surface area, as well as to further examine any structural anomalies to the surface of the

**Table 1.** Seawater carbonate chemistry values for the four treatments.

| TRT               | T (°C)        | Sal (‰)       | pH <sub>T</sub> | TA (μmol/kg)     | DIC (μmol/kg)    | pCO <sub>2</sub> (μatm) | HCO <sub>3</sub> <sup>-</sup> (μmol/kg) | CO <sub>3</sub> <sup>-2</sup> (μmol/kg) | Ω <sub>arag</sub> | Ω <sub>calc</sub> |
|-------------------|---------------|---------------|-----------------|------------------|------------------|-------------------------|-----------------------------------------|-----------------------------------------|-------------------|-------------------|
| Ambient           | 12.14 (±0.48) | 33.58 (±0.72) | 7.99 (±0.05)    | 2263.57 (±15.70) | 2093.78 (±12.69) | 465.82 (±63.15)         | 1959.02 (±30.99)                        | 125.46 (±12.67)                         | 1.91 (±0.20)      | 3.00 (±0.31)      |
| Warming           | 15.84 (±0.27) | 33.71 (±0.69) | 7.95 (±0.03)    | 2263.75 (±15.99) | 2087.47 (±13.67) | 516.77 (±40.94)         | 1942.52 (±18.28)                        | 131.45 (±8.00)                          | 2.02 (±0.12)      | 3.15 (±0.19)      |
| Acidified         | 12.18 (±0.48) | 33.63 (±0.71) | 7.65 (±0.06)    | 2264.69 (±16.97) | 2213.62 (±19.08) | 1087.69 (±169.87)       | 2113.12 (±21.27)                        | 63.35 (±9.57)                           | 0.97 (±0.14)      | 1.52 (±0.23)      |
| Warming+Acidified | 16.11 (±0.28) | 33.54 (±0.72) | 7.63 (±0.05)    | 2265.32 (±16.50) | 2205.95 (±15.69) | 1161.35 (±136.86)       | 2101.03 (±17.23)                        | 69.07 (±7.37)                           | 1.06 (±0.11)      | 1.66 (±0.17)      |

Values represent the mean ±SD of bimonthly measures taken over the six months exposure period (n = 12 for each treatment). Mussels were either exposed to: ambient pH and ambient temperature (ambient); ambient pH and elevated temperature (warming); reduced pH and ambient temperature (acidified); or reduced pH and elevated temperature (warming+acidified). TRT represents treatment, T = temperature, Sal = Salinity, pH<sub>T</sub> = pH (total scale), TA = total alkalinity, DIC = dissolved inorganic carbon, pCO<sub>2</sub> = CO<sub>2</sub> partial pressure, HCO<sub>3</sub><sup>-</sup> = bicarbonate, CO<sub>3</sub><sup>2-</sup> = carbonate, Ω<sub>arag</sub> = aragonite saturation state, and Ω<sub>calc</sub> = calcite saturation state. Measured values are: temperature, salinity, TA, and DIC. Calculated values are pH, pCO<sub>2</sub>, HCO<sub>3</sub><sup>-</sup>, CO<sub>3</sub><sup>2-</sup>, Ω<sub>arag</sub> and Ω<sub>calc</sub>.

doi:10.1371/journal.pone.0086764.t001

shells. These additional examinations were carried out to determine whether ocean acidification and/or warming are capable of dissolving the surface of the shells causing surface abrasions and pitting. In order to determine the surface area of a shell valve, mussel shells were dried and then broken into smaller fragments of approximately 5 mm length. To ensure representative results of the whole shell at least three subsamples consisting of a number of shell fragments (of 0.1–0.3 g total mass) per shell were analysed to determine mean values. Analysis was performed on a Gemini Surface Area Analyser (Micromeritics Instrument Corporation, Georgia, USA) using liquid nitrogen as the coolant. Surface area was determined by nitrogen adsorption on to the surface of the shell fragments. The amount of gas adsorbed at a given pressure allowed for calculation of the surface area utilising the Brunauer, Emmett and Teller (B.E.T.) theory [38].

### Shell Composition

X-ray diffraction was used to determine the mixture of calcium carbonate polymorphs (calcite and aragonite) in each shell. Powder samples of five shells per treatment were analysed using a Bruker AXS D8 Advance X-ray Diffractometer equipped with a superspeed PSD:Vantec-1 detector and CuK<sub>α</sub> X-ray source. Data was obtained in the 2-theta range 20 to 60°, with a step size of 0.016° and time of 0.538 seconds per step. X-ray diffraction patterns were background corrected using AXS software (Bruker Corporation, Germany). The procedure reported by Kontoyannis and Vagenas [39] was employed for quantitative analysis. This method uses a calibration line constructed from the intensities of the (104) reflection peak for calcite, (C), 2-theta 29.4° and the (221) reflection peak at 2-theta 46° for aragonite, (A). Linear regression of peak intensity, (I), ratios against molar fraction, (X), ratios allowed Kontoyannis and Vagenas [39] to derive the relationship shown in the following equation, which was used to calculate the calcite:aragonite ratios of the shells studied.

$$\frac{I_C^{104}}{I_A^{221}} = 3.157 \times \frac{X_C}{X_A} \quad (1)$$

### Data Analysis

Data was tested for normality and homogeneity of variances (Levene's Test). If necessary, data was log-transformed to meet

assumptions. The significance of the effects of temperature, or the effects of pH, or any interactions between the two factors on the parameters measured were tested by two-way ANOVA. Significant findings were followed by LSD post-hoc tests. All F statistics and p values given in parenthesis in the text represent the results of the respective ANOVAs, and all p values given on their own represent the outcome of subsequent post-hoc tests. Data are presented as means ±SE unless otherwise stated. Statistical analyses were performed using SPSS software (SPSS 14, SPSS INC, Chicago, IL, USA).

## Results

### Condition Index (CI)

After six months exposure to the treatments, mean CI of adult mussels was significantly affected by temperature (F = 11.869, p = 0.001) but not by pH (F = 0.014, p = 0.906) (Fig. 2). Interaction between the two factors was marginally significant (F = 3.644, p = 0.060). Warming by 4°C resulted in a highly significant reduction in CI from 4.1±0.19 to 2.9±0.17 in mussels held at ambient pH (p<0.001). After six months, CI was significantly lower than the baseline value of 6.44±0.25 (n = 20) for all treatments (p<0.001).

### Shell Morphometrics

After six months exposure temperature had a significant effect on shell thickness (at distal edge), but had no effect on total shell dry weight, length, width, height, and thickness at the umbone (Tables 2 and 3). Mussels held at decreased pH had significantly thicker shells at the distal edge at elevated compared with ambient temperatures (p = 0.008). Seawater pH had no effect of any of the morphological parameters but there was a significant interaction between pH and temperature with regards to shell height (Table 3). Mussels held at ambient pH and elevated temperature (warming) had significantly shorter shell heights than those at elevated temperature and decreased pH (warming+acidified) (p = 0.007) and those at ambient pH and ambient temperature (ambient) (p = 0.018) (Table 2).

### Shell Strength

Two-way ANOVA showed that temperature, but not pH, had a significant effect on the maximum load endured by the mussel shells (F = 31.624, p<0.001 and F = 1.131, p = 0.289, respectively), although there was a near-significant interaction between the two

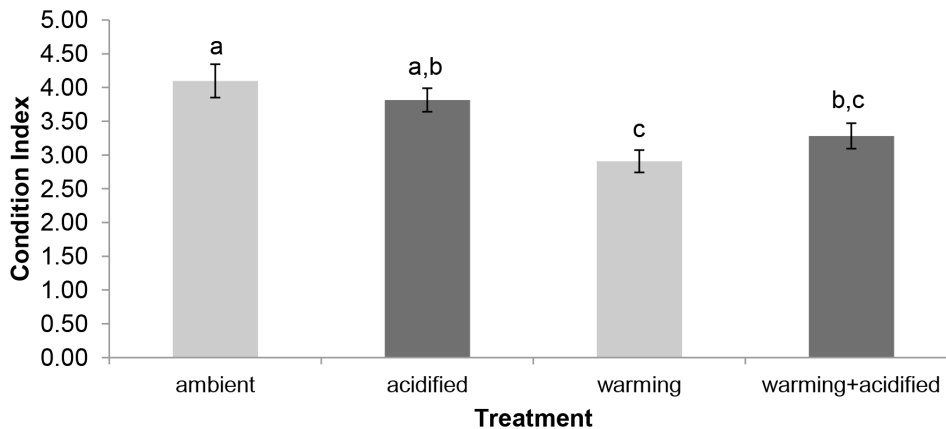

**Figure 2. Effects of warming and/or acidification on condition index (CI) in *M. edulis*.** Mussels were held for six months under: ambient temperature and ambient pH (ambient); ambient temperature and reduced pH (acidified); elevated temperature and ambient pH (warming); and elevated temperature and reduced pH (warming+acidified). Values given as means  $\pm$  SE ( $n = 20$  per treatment). Acidified treatments shown in dark grey. Significant differences indicated by different lowercase letters ( $p < 0.05$ ). doi:10.1371/journal.pone.0086764.g002

factors ( $F = 3.590$ ,  $p = 0.060$ ). Shells from mussels held in ambient conditions (ambient) had significantly higher maximum load values than shells from all other treatments (warming, acidified, warming+acidified) ( $p < 0.001$ ,  $p = 0.040$  and  $p < 0.001$ , respectively). Likewise, those mussels kept at ambient temperature and reduced pH (acidified) had significantly higher maximum loads than those kept at higher temperature (warming+acidified; warming ( $p = 0.010$  and  $p = 0.002$ ) (Fig. 3A).

Seawater pH had a significant effect on shell extension values ( $F = 12.649$ ,  $p = 0.001$ ), but not temperature ( $F = 1.113$ ,  $p = 0.293$ ), and there was a significant interaction between the two factors ( $F = 6.439$ ,  $p = 0.012$ ). Shell extension values were significantly lower in mussels held at elevated temperature and decreased pH (warming+acidified) when compared with mussels in all other treatments (ambient, warming, acidified) ( $p = 0.001$ ,  $p < 0.001$  and  $p = 0.013$ , respectively) (Fig. 3B).

### Shell Surface Analysis

Changes in surface areas of the shells under the various treatments are given in Fig. 4. Two-way ANOVA showed a significant effect of temperature on shell surface area ( $F = 10.355$ ,

$p = 0.003$ ) but neither pH nor the interaction of pH and temperature were significant ( $F = 2.045$ ,  $p = 0.162$  and  $F = 0.582$ ,  $p = 0.451$ , respectively). The largest mean surface area of the shells at  $0.478 \pm 0.085 \text{ m}^2 \text{ g}^{-1}$  was observed in control mussels kept under ambient conditions. The smallest surface areas were obtained in shells from mussels exposed to the combined effects of elevated temperature and low pH (warming+acidified) but these differences were only significant when compared with mussels held at ambient conditions ( $p = 0.002$ ). At ambient pH, elevated temperature decreased shell surface area by 50%, which was a significant change ( $p = 0.008$ ).

### Shell Composition

The signal-to-noise ratio on the X-ray diffraction patterns indicated that all samples contained a significant amount of amorphous material, however, it was not possible to quantify this component. Calculations were not carried out for samples where the signal-to-noise ratio was very low, i.e. signal strength was not significantly greater than the background noise. Calcite:aragonite molar fractions are given in Table 2 where  $n = 4$ , except for under acidified conditions where only two values were obtained. Two-

**Table 2. Shell morphometrics and shell composition.**

| RESPONSE                        | UNITS | TREATMENT           |                      |                     |                     |
|---------------------------------|-------|---------------------|----------------------|---------------------|---------------------|
|                                 |       | Ambient             | Warming              | Acidified           | Warming+Acidified   |
| Shell Dry Weight                | g     | 3.18( $\pm 0.17$ )  | 2.97( $\pm 0.12$ )   | 3.07( $\pm 0.15$ )  | 3.09( $\pm 0.16$ )  |
| Shell Length                    | mm    | 49.32( $\pm 0.85$ ) | 49.71 ( $\pm 0.55$ ) | 49.43( $\pm 0.82$ ) | 50.00( $\pm 0.87$ ) |
| Shell Width                     | mm    | 23.44( $\pm 0.34$ ) | 23.55 ( $\pm 0.18$ ) | 23.55( $\pm 0.22$ ) | 23.95( $\pm 0.37$ ) |
| Shell Height                    | mm    | 9.30( $\pm 0.20$ )  | 8.87 ( $\pm 0.12$ )  | 9.17( $\pm 0.17$ )  | 9.35( $\pm 0.22$ )  |
| Shell Thickness <sub>U</sub>    | mm    | 1.40( $\pm 0.06$ )  | 1.35( $\pm 0.06$ )   | 1.35( $\pm 0.05$ )  | 1.35( $\pm 0.05$ )  |
| Shell Thickness <sub>DE</sub>   | mm    | 1.10( $\pm 0.04$ )  | 1.13( $\pm 0.05$ )   | 1.06( $\pm 0.03$ )  | 1.17( $\pm 0.04$ )  |
| Calcite:Aragonite <sub>MF</sub> | -     | 2.1( $\pm 0.48$ )   | 1.7( $\pm 0.15$ )    | 3.2, 2.9            | 2.2( $\pm 0.39$ )   |

Mean values  $\pm$  SE for shell dry weight, shell length, shell width, shell height and shell thickness (umbo and distal edge), and molar fraction of calcite:aragonite in *M. edulis* following a six month exposure period to four pH-temperature treatments: ambient pH and ambient temperature (ambient); ambient pH and elevated temperature (warming); reduced pH and ambient temperature (acidified); or reduced pH and elevated temperature (warming+acidified).  $N = 18$  per treatment for the morphometric determinations, and  $N = 4$  for shell composition, with the exception of the acidified treatment when only 2 values were recorded and both of these are given. ML: maximum load, E: extension, MF: molar fraction, U: umbo, DE: distal edge.

doi:10.1371/journal.pone.0086764.t002

**Table 3.** Two-way ANOVA results comparing the effect of pH and temperature on shell morphometrics (n = 18).

| Source of variation       | df | SS    | MS    | F-ratio | P-value       |
|---------------------------|----|-------|-------|---------|---------------|
| <b>Dry Weight</b>         |    |       |       |         |               |
| pH                        | 1  | 0.002 | .002  | 0.006   | 0.939         |
| Temperature               | 1  | 0.361 | 0.361 | 0.862   | 0.355         |
| pH*Temperature            | 1  | 0.474 | 0.474 | 1.130   | 0.290         |
| <b>Length</b>             |    |       |       |         |               |
| pH                        | 1  | 1.383 | 1.383 | 0.128   | 0.721         |
| Temperature               | 1  | 8.119 | 8.119 | 0.753   | 0.387         |
| pH*Temperature            | 1  | 0.281 | 0.281 | 0.026   | 0.872         |
| <b>Width</b>              |    |       |       |         |               |
| pH                        | 1  | 2.341 | 2.341 | 1.604   | 0.207         |
| Temperature               | 1  | 2.298 | 2.298 | 1.575   | 0.212         |
| pH*Temperature            | 1  | 0.767 | 0.767 | 0.525   | 0.470         |
| <b>Height</b>             |    |       |       |         |               |
| pH                        | 1  | 1.124 | 1.124 | 1.970   | 0.163         |
| Temperature               | 1  | 0.515 | 0.515 | 0.903   | 0.344         |
| pH*Temperature            | 1  | 3.320 | 3.320 | 5.821   | <b>0.017*</b> |
| <b>Thickness (umbone)</b> |    |       |       |         |               |
| pH                        | 1  | 0.023 | 0.023 | 0.449   | 0.504         |
| Temperature               | 1  | 0.022 | 0.022 | 0.437   | 0.510         |
| pH*Temperature            | 1  | 0.019 | 0.019 | 0.374   | 0.542         |
| <b>Thickness (edge)</b>   |    |       |       |         |               |
| pH                        | 1  | 0.000 | 0.000 | 0.007   | 0.933         |
| Temperature               | 1  | 0.165 | 6.282 | 6.282   | <b>0.013*</b> |
| pH*Temperature            | 1  | 0.048 | 1.827 | 1.827   | 0.179         |

Significant differences in bold and presented by an asterisk ( $p < 0.05$ ).  
doi:10.1371/journal.pone.0086764.t003

way ANOVA showed no overall effect of temperature or pH on calcite:aragonite ratios, nor an interaction between the two factors (values for warming+acidified treatment not included).

## Discussion

Data from the maximum loading measurements demonstrated that warming by 4°C for six months had a greater effect on shell strength in *M. edulis* when food was limiting, than a reduction in seawater pH of 0.4 pH units. Consequently, mussels held at 16°C had weaker shells than mussels held at 12°C, regardless of pH level. Shell strength in *M. edulis* has been attributed to material composition and overall shell thickness, size and shape [20]. As the morphology of the shells was generally unaffected by all treatments, the changes in shell strength with temperature observed here cannot be attributed to changes in biometrics. The reduction in shell height during warming at ambient pH was one exception, as was the increase in shell thickness during warming and acidification. Shell height is not normally associated with shell strength, and although shell thickness has been shown to be an effective predictor of strength in *M. edulis* [40], the increase in thickness noted here had no effect on overall strength, and may not be representative of shell thickness in other parts of the shell margin. In addition, preliminary determinations of shell composition using X-ray diffraction of the same mussel shells used for the loading experiments, indicated that the calcite:aragonite molar fraction was unaffected by six months exposure to either warming

or acidification. Consequently changes in material composition are unlikely to have been involved, although the possibility that warming affected shell strength via shifts in CaCO<sub>3</sub> polymorph composition requires more sophisticated investigation. Instead, the present study was able to demonstrate that reductions in shell strength with warming were accompanied by decreases in shell surface area and a fall in whole-body CI.

The reductions in shell surface area with warming recorded here represent surface area reductions of both the outer and inner nacreous layer of the shell fragments. Bivalve shell nacre possesses a deformation mechanism that permits it to exhibit inelastic strain when a force is exerted upon the shell. Inelastic strain allows the nacreous material to redistribute stress around strain concentration sites thereby improving the resistance of the shell to fracture. The level of force at which the inelastic deformation occurs is controlled by mineral asperities on the surface of the aragonite tablets which dictate sliding resistance of neighbouring laminae [41]. In the present study the reduction in shell surface area of the mussels maintained in the warming and acidified condition corresponded with a reduction in shell flexibility. A decreased surface area to volume ratio suggests more extensive shell corrosion and reduced microstructural complexity (e.g. decreased occurrence of asperities, decreased number of laminae, reduced tablet structure) and results in a reduction in the shell's ability to redistribute stress, thereby reducing material maximum load and extension capabilities.

The maintenance of shell integrity is a dynamic process that is under biological control and takes place in a small compartment, the extrapallial cavity [2,4]. Shell corrosion is reported to occur on a daily basis in mussels inhabiting the intertidal zone because they are unable to regulate increases in extracellular pCO<sub>2</sub>, which occur at the mantle shell interface during emersion [2,42]. The resulting extracellular acidosis increases shell dissolution but shell integrity is maintained by continuous shell formation [2]. Shell formation and repair, however, are energetically expensive because of the costs associated with the accumulation, transportation and precipitation of calcium carbonate [43,44,45], as well as the costs of the processes involved in the formation of the biologically active, organic matrix [43]. Consequently, shell corrosion in *M. edulis* is related to energy budgets, even under conditions of ambient CO<sub>2</sub>, because shell corrosion is more extensive when food, and therefore energy supply, is limiting both in the laboratory and in the field [2,46]. In the current study, mussels received 27 mg dry mass mussel<sup>-1</sup> day<sup>-1</sup> of algae but were not fed continuously, instead having their entire daily ration delivered over an approximate time span of 4–6 hours. As a result all mussels, even those held in the control treatment of ambient temperature and ambient pH, experienced a decrease in CI which generally indicates a state of lowered “health” [47] and illustrates that the mussels were receiving insufficient food. Moreover, none of the mussels showed any growth over the six month period, regardless of treatment. If restricted access to algae prevented growth and reduced condition in the mussels then exposure to warming could have further increased energy demands at a time when energy supply was limited. Similar temperature-related decreases in bivalve CI have been demonstrated in *M. edulis* and *Arctica islandica* [48,49], and also in the abalone, *Haliotis iris*, where decreases in shell strength induced by bifacial porosis and endobiont infestations were correlated with reduced CI [50]. The decline in CI observed here suggests that energy reserves were depleted and tissues reabsorbed which typically occurs in bivalves in response to stressful conditions in order to support maintenance energy requirements [51,52].

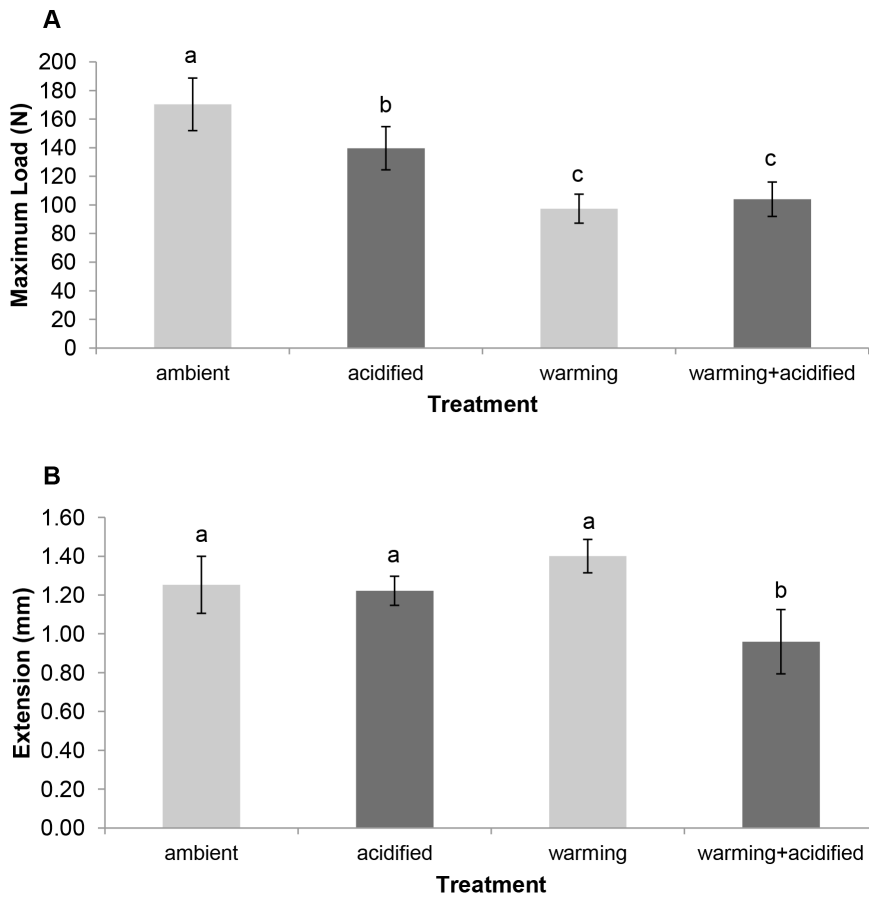

**Figure 3. Effects of warming and/or acidification on shell strength.** A) Maximum load endured until fracture and B) extension or distance a shell will bend/flex before failure of shells from *M. edulis* held for six months under: ambient temperature and ambient pH (ambient); ambient temperature and reduced pH (acidified); elevated temperature and ambient pH (warming); and elevated temperature and reduced pH (warming+acidified). Values given as means  $\pm$ SE (n = 18 per treatment). Acidified treatments shown in dark grey. Significant differences indicated by different lowercase letters (p<0.05). doi:10.1371/journal.pone.0086764.g003

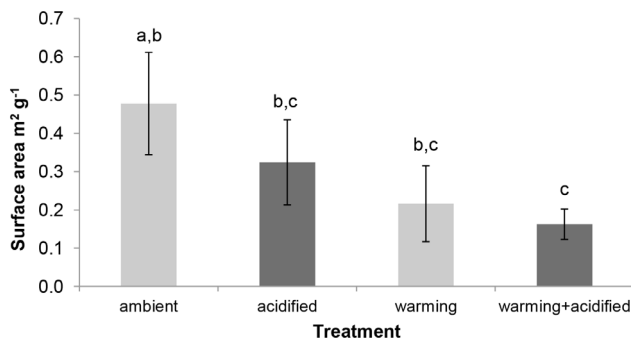

**Figure 4. Effects of warming and/or acidification on shell surface area.** Shell surface area was determined in at least three subsamples consisting of a number of shell fragments (of 0.1–0.3 g total mass) per shell from *M. edulis* held for six months at either: ambient temperature and ambient pH (ambient); ambient temperature and reduced pH (acidified); elevated temperature and ambient pH (warming); or elevated temperature and reduced pH (warming+acidified). Values given as means  $\pm$ SE (n = 3). Acidified treatments shown in dark grey. Significant differences indicated by different lowercase letters (p<0.05). doi:10.1371/journal.pone.0086764.g004

Studies on the effects of OA on the growth or calcification rates of shells from *M. edulis* have demonstrated that exposure to the pH levels predicted for 2100 has no effect. Maintenance of shell formation and growth in *M. edulis* despite changes in seawater carbonate chemistry associated with OA has been attributed to a number of factors, such as protection against shell dissolution by the protective organic layer (periostracum), and the mineralogy of the shell [4]. In addition, the ability of *M. edulis* to compensate for the possible dissolution effects of reduced pH on their shells is related to their occupation of habitats characterised by fluctuating pH levels and the capacity of mussels to maintain control rates of shell growth as long as food is in ample supply [46]. The lack of any pH effect on shell morphometrics or shell strength in terms of maximum load capabilities in the present study may also be explained in terms of the cellular model for biomineralisation which maintains that shell formation in molluscs involves the formation of CaCO<sub>3</sub> crystals in haemocytes which are deposited at the mineralisation front [53,54]. The involvement of intracellular crystal formation negates the requirement for CaCO<sub>3</sub> supersaturation in the extracellular compartment where the shell is formed [53,55], although Roleda *et al.* [55] also argue that HCO<sub>3</sub><sup>-</sup> and metabolic CO<sub>2</sub> are more important to calcification processes than CO<sub>3</sub><sup>2-</sup> and hence CaCO<sub>3</sub> saturation levels. Collectively these studies demonstrate that reductions in seawater pH do not have a

direct effect on calcification processes in mussel shells, and this may help to explain the maintenance of shell strength in the present study when mussels were exposed to reduced pH for six months. However, the impact of lowered pH to extension properties of the shell which paralleled temperature effects to shell maximum load suggests that ocean acidification does pose some threat to the condition of the shell. Such decreases may indicate an increased brittleness of the shell brought on by acidified conditions. However the actual mechanisms behind such changes in brittleness require further investigation.

The reduction in shell strength observed here in *M. edulis* is likely to influence survival given the critical role of the shells in prey selection. Predator species have demonstrated an aptitude for testing shell strength and using spot weaknesses to gain access to their food source [56]. Nagarajan *et al.* [21] also demonstrated that predators tend to attack weaker, more thinly-shelled mussels. Therefore, any weakening of shells under future conditions of ocean warming and acidification suggests that *M. edulis* may become increasingly vulnerable to predation. Although *Mytilus* have demonstrated an ability to increase shell thickness and mass, and consequently strength, in high predation sites [57], such compensatory adjustments may not be possible under future warming conditions because of the allocation of energy for temperature-related increases in maintenance requirements. The energy required for compensatory adjustments in shell thickness and mass may be further restricted by any associated declines in food supply that may occur as a result of warming. The observed reductions in soft tissue mass with temperature are concerning because this implies reduced aerobic scope of *M. edulis* and a decline in reserves for ecologically important activities such as growth, fecundity and annual recruitment [31].

## References

- Gazeau F, Quiblier C, Jansen JM, Gattuso JP, Middelburg JJ, *et al.* (2007) Impact of elevated CO<sub>2</sub> on shellfish calcification. *Geophys Res Lett* 34: 1–5.
- Melzner F, Stange P, Trübenbach K, Thomsen J, Casties I, *et al.* (2011) Food supply and seawater pCO<sub>2</sub> impact calcification and internal shell dissolution in the blue mussel *Mytilus edulis*. *PLoS ONE* 6(9): e24223.
- Hüning AK, Melzner F, Thomsen J, Gutowska MA, Krämer L, *et al.* (2013) Impacts of seawater acidification on mantle gene expression patterns of the Baltic Sea blue mussel: implications for shell formation and energy metabolism. *Mar Biol* 160(8): 1845–1861.
- Gazeau F, Parker LM, Comeau S, Gattuso JP, O'Connor WA *et al.* (2013) Impacts of ocean acidification on marine shelled molluscs. *Mar Biol* 160(8): 2207–2245.
- Findlay HS, Wood HL, Kendall MA, Spicer JJ, Twitchett RJ, *et al.* (2011) Comparing the impact of high CO<sub>2</sub> on calcium carbonate structures in different marine organisms. *Mar Biol Res* 7: 565–575.
- Ries JB, Cohen AL, McCorkle DC (2009) Marine calcifiers exhibit mixed responses to CO<sub>2</sub>-induced ocean acidification. *Geology* 37: 1131–1134.
- Parker LM, Ross PM, O'Connor WA (2010) Comparing the effect of elevated pCO<sub>2</sub> and temperature on the fertilization and early development of two species of oysters. *Mar Biol* 157: 2435–2452.
- Talmage SC, Gobler CJ (2010) Effects of past, present, and future ocean carbon dioxide concentrations on the growth and survival of larval shellfish. *Proc Natl Acad Sci USA* 107: 17246–172451.
- Beniash E, Ivanina A, Lieb N, Kurochkin I, Sokolova I (2010) Elevated level of carbon dioxide affects metabolism and shell formation in oysters *Crassostrea virginica* (Gmelin). *Mar Ecol Prog Ser* 419: 95–108.
- Welladsen HM, Southgate PC, Heimann K (2010) The effects of exposure to near-future levels of ocean acidification on shell characteristics of *Pinctada fucata* (Bivalvia: Pteriidae). *Mollus Res* 30: 125–130.
- Gaylord B, Hill TM, Sanford E, Lenz EA, Jacobs LA, *et al.* (2011) Functional impacts of ocean acidification in an ecologically critical foundation species. *J Exp Biol* 214: 2586–94.
- Gooding RA, Harley CDG, Tang E (2009) Elevated water temperature and carbon dioxide concentration increase the growth of a keystone echinoderm. *Proc Natl Acad Sci USA* 106: 9316–9321.
- Martin S, Gattuso JP (2009) Response of Mediterranean coralline algae to ocean acidification and elevated temperature. *Global Change Biol* 15: 2089–2100.
- Liu W, Huang X, Lin J, He M (2012) Seawater acidification and elevated temperature affect gene expression patterns of the pearl oyster *Pinctada fucata*. *PLoS ONE* 7: e33679.
- Mattoo OB, Ivanina AV, Ullstad C, Beniash E, Sokolova IM (2013) Interactive effects of elevated temperature and CO<sub>2</sub> levels on metabolism and oxidative stress in two common marine bivalves (*Crassostrea virginica* and *Mercenaria mercenaria*). *Comp Biochem Physiol* 164(4): 545–53.
- Nicholls RJ, Wong PP, Burkett VR, Codignotto JO, Hay JE, *et al.* (2007) Coastal systems and low-lying areas. In: Parry ML, Canziani OF, Palutikof JP, van der Linden PJ, Hanson CE, editors. *Climate Change 2007: Impacts, adaptation and vulnerability. Contribution of Working Group II to the Fourth Assessment Report of the Intergovernmental Panel on Climate Change*. Cambridge: Cambridge University Press. 315–356.
- Bindoff NL, Willebrand J, Artale A, Cazenave A, Gregory J, *et al.* (2007) Observations: Oceanic climate change and sea level. In: Solomon S, Qin D, Manning M, Chen Z, Marquis M, Averyt KB, Tignor M, Miller HL, editors. *Climate Change 2007: The Physical Science Basis. Contribution of Working Group I to the Fourth Assessment Report of the Intergovernmental Panel on Climate Change*. Cambridge: Cambridge University Press. 385–432.
- Sabine CL, Feely RA, Gruber N, Key RM, Lee K, *et al.* (2004) The oceanic sink for anthropogenic CO<sub>2</sub>. *Science* 305(367): 367–71.
- Almada-Villela PC, Davenport J, Gruffydd LD (1982) The effects of temperature on the shell growth of young *Mytilus edulis* L. *J Exp Biol* 59: 275–288.
- Vermeij GJ (1993) *A natural history of shells*. Princeton: Princeton University Press. 207 p.
- Nagarajan R, Lea SEG, Goss-Custard JD (2006) Seasonal variations in mussel, *Mytilus edulis* L. shell thickness and strength and their ecological implications. *J Exp Mar Biol Ecol* 339: 241–250.
- Carter JG (1980) Environmental and biological controls of bivalve shell mineralogy and structure. In: Rhoads DC, Lutz RA, editors. *Skeletal growth of aquatic organisms*. New York: Plenum. 69–115.
- Olson IC, Kozdon R, Valley JW, Gilbert PUPA (2012) Mollusk shell nacre ultrastructure correlates with environmental temperature and pressure. *J Am Chem Soc* 134: 7351–7358.
- Hofmann GE, Todgham AE (2010) Living in the now: physiological mechanisms to tolerate a rapidly changing environment. *Ann Rev Physiol* 72: 127–145.
- Branch TA, DeJoseph BM, Ray IJ, Wagner CA (2013) Impacts of ocean acidification on marine seafood. *Trends Evol Ecol* 28: 178–86.
- Food and Agriculture Organization (FAO) (2008) *The State of World Fisheries and Aquaculture (SOFIA)*. Rome: FAO.

## Acknowledgments

The authors would like to thank Richard Patton for his help maintaining the mussels during the six month exposures.

## Author Contributions

Conceived and designed the experiments: CLM GAO NMW SKM. Performed the experiments: CLM GAO SFC RJB. Analyzed the data: CLM SFC RJB. Contributed reagents/materials/analysis tools: GAO SFC RJB SKM. Wrote the paper: CLM NMW. Maintenance of the animals: CLM NMW.



27. Holt TJ, Rees EI, Hawkins SJ, Seed R (1998) Biogenic Reefs (volume IX). An overview of dynamic and sensitivity characteristics for conservation management of marine SACs. Scottish Association for Marine Science (UK Marine SACs Project). 170 p.
28. Shumway SE, Davis C, Downey R, Karney R, Kraeuter J, et al. (2003) Shellfish aquaculture—in praise of sustainable economics and environments. *World Aquaculture* 34: 15–18.
29. Gosling E (2003) Bivalve Molluscs: Biology, Ecology and Culture. Cornwall, Great Britain: Blackwell Publishing. 433 p.
30. Wheeler AP (1992) Mechanisms of molluscan shell formation. In: Bonucci E, editor. Calcification in biological systems. Boca Raton, Florida: CRC Press. 179–215.
31. Sokolova IM, Frederich M, Bagwe R, Lannig G, Sukhotin AA (2012) Energy homeostasis as an integrative tool for assessing limits of environmental stress tolerance in aquatic invertebrates. *Mar Environ Res* 79: 1–15.
32. Clausen I, Riisgard HU (1996) Growth, filtration and respiration in the mussel *Mytilus edulis*: no evidence for physiological regulation of the filter-pump to nutritional needs. *Mar Ecol Prog Ser* 141: 37–45.
33. Dumousseaud C, Achterberg E, Tyrrell T (2011) Practical Guide for the UK Ocean Acidification Research Programme (UKOARP) Carbonate Chemistry Facility. National Oceanography Centre, University of Southampton, Southampton, UK. 11 pp. Available: [http://www.noc.soton.ac.uk/ukoarf/practical\\_guide.pdf](http://www.noc.soton.ac.uk/ukoarf/practical_guide.pdf).
34. Lewis E, Wallace D (1998) Program developed for CO<sub>2</sub> system calculations. Oakridge National Lab: US Department of Energy. 38 p.
35. Mehrbach C, Culbertson CH, Hawley JE, Pytkowicz RM (1973) Measurements of the apparent dissociation constants of carbonic acid in seawater at atmospheric pressure. *Limnol Oceanography* 18: 897–907.
36. Dickson AG, Millero FJ (1987) A comparison of the equilibrium constants for the dissociation of carbonic acid in seawater media. *Deep-Sea Res* 34: 1733–1743.
37. Seed R (1968) Factors influencing shell shape in the mussel *Mytilus edulis*. *J Mar Biol Assoc UK* 48: 561–584.
38. Brunauer S, Emmett PH, Teller E (1938) Adsorption of gases in multimolecular layers. *J Am Chem Soc* 60: 309–319.
39. Kontoyannis CG, Vagenas NV (2000) Calcium carbonate phase analysis using XRD and FT-Raman spectroscopy. *Analyst* 125: 251–255.
40. Zuschin M, Stanton RJ (2001) Experimental measurement of shell strength and its taphonomic interpretation. *PALAIOS* 16: 161–170.
41. Wang RZ, Gupta HS (2011) Deformation and fracture mechanisms of bone and nacre. *Ann Rev Mat Res* 41: 41–73.
42. Melzner F, Gutowska MA, Langenbuch M, Dupont S, Lacassen M, et al. (2009) Physiological basis for high CO<sub>2</sub> tolerance in marine ectothermic animals: pre-adaptation through lifestyle and ontogeny? *Biogeosciences* 6: 2313–2331.
43. Palmer AR (1983) Relative cost of producing skeletal organic matrix versus calcification: evidence from marine gastropods. *Mar Biol* 75: 287–292.
44. Palmer AR (1992) Calcification in marine molluscs: how costly is it? *Proc Natl Acad Sci USA* 89: 1379–1382.
45. Ries JB (2011) Skeletal mineralogy in a high-CO<sub>2</sub> world. *J Exp Mar Biol Ecol* 403: 54–64.
46. Thomsen J, Casties I, Pansch C, Körtzinger A, Melzner F (2013) Food availability outweighs ocean acidification effects in juvenile *Mytilus edulis*: laboratory and field experiments. *Global Change Biol* 19: 1017–27.
47. Lucas A, Beninger PG (1985) The use of physiological condition indices in marine bivalve aquaculture. *Aquaculture* 44: 187–200.
48. Bayne BL, Thompson RJ (1970) Some physiological consequences of keeping *Mytilus edulis* in the laboratory. *Helgoländer Wissenschaftliche Meeresuntersuchungen* 20: 526–552.
49. Hiebenthal C, Philipp EER, Eisenhauer A, Wahl M (2012) Interactive effects of temperature and salinity on shell formation and general condition in Baltic Sea *Mytilus edulis* and *Arctica islandica*. *Aquat Biol* 14: 289–298.
50. Dunphy BJ, Wells RMG (2001) Endobiont infestation, shell strength and condition index in wild populations of New Zealand abalone, *Haliotis iris*. *Mar Freshwater Res* 52: 781–786.
51. Beesley A, Lowe D, Pascoe C, Widdicombe S (2008) Effects of CO<sub>2</sub>-induced seawater acidification on the health of *Mytilus edulis*. *Clim Res* 37: 215–225.
52. Lannig G, Eilers S, Pörtner HO, Sokolova IM, Bock C (2010) Impact of ocean acidification on energy metabolism of oyster, *Crassostrea gigas* - changes in metabolic pathways and thermal response. *Mar Drugs* 8: 2318–39.
53. Mount AS, Wheeler AP, Paradrkar RP, Snider D (2004) Hemocyte-mediated shell mineralization in the Eastern oyster. *Science* 304: 297–300.
54. Zhang G, Fang X, Guo X, Li L, Luo R, et al. (2012) The oyster genome reveals stress adaptation and complexity of shell formation. *Nature* 490: 49–54.
55. Roleda MY, Boyd PW, Hurd CL (2012) Before ocean acidification: calcifier chemistry lessons 1. *J Phycol* 48(4): 840–843.
56. Elner RW (1978) The mechanics of predation by the shore crab, *Carcinus maenas* (L.), on the edible mussel, *Mytilus edulis* L. *Oecologia* 36: 333–344.
57. Leonard GH, Ertness MD, Yund PO (1999) Crab predation, waterborne cues, and inducible defenses in the blue mussel, *Mytilus edulis*. *Ecology* 80: 1–14.
58. Thomsen J, Melzner F (2010) Moderate seawater acidification does not elicit long-term metabolic depression in the blue mussel *Mytilus edulis*. *Mar Biol* 157: 2667–2676.
